# Supplementary material for: Phylogenetics of subtribe Orchidinae s.l. (Orchidaceae; Orchidoideae) based on seven markers (plastid matK, psaB, rbcL, trnL-F, trnH-psba, and nuclear nrITS, Xdh): implications for generic delimitation
Source: PubMed Central journal article supplement (PMC5702240; doi:10.1186/s12870-017-1160-x), 2017-11-25

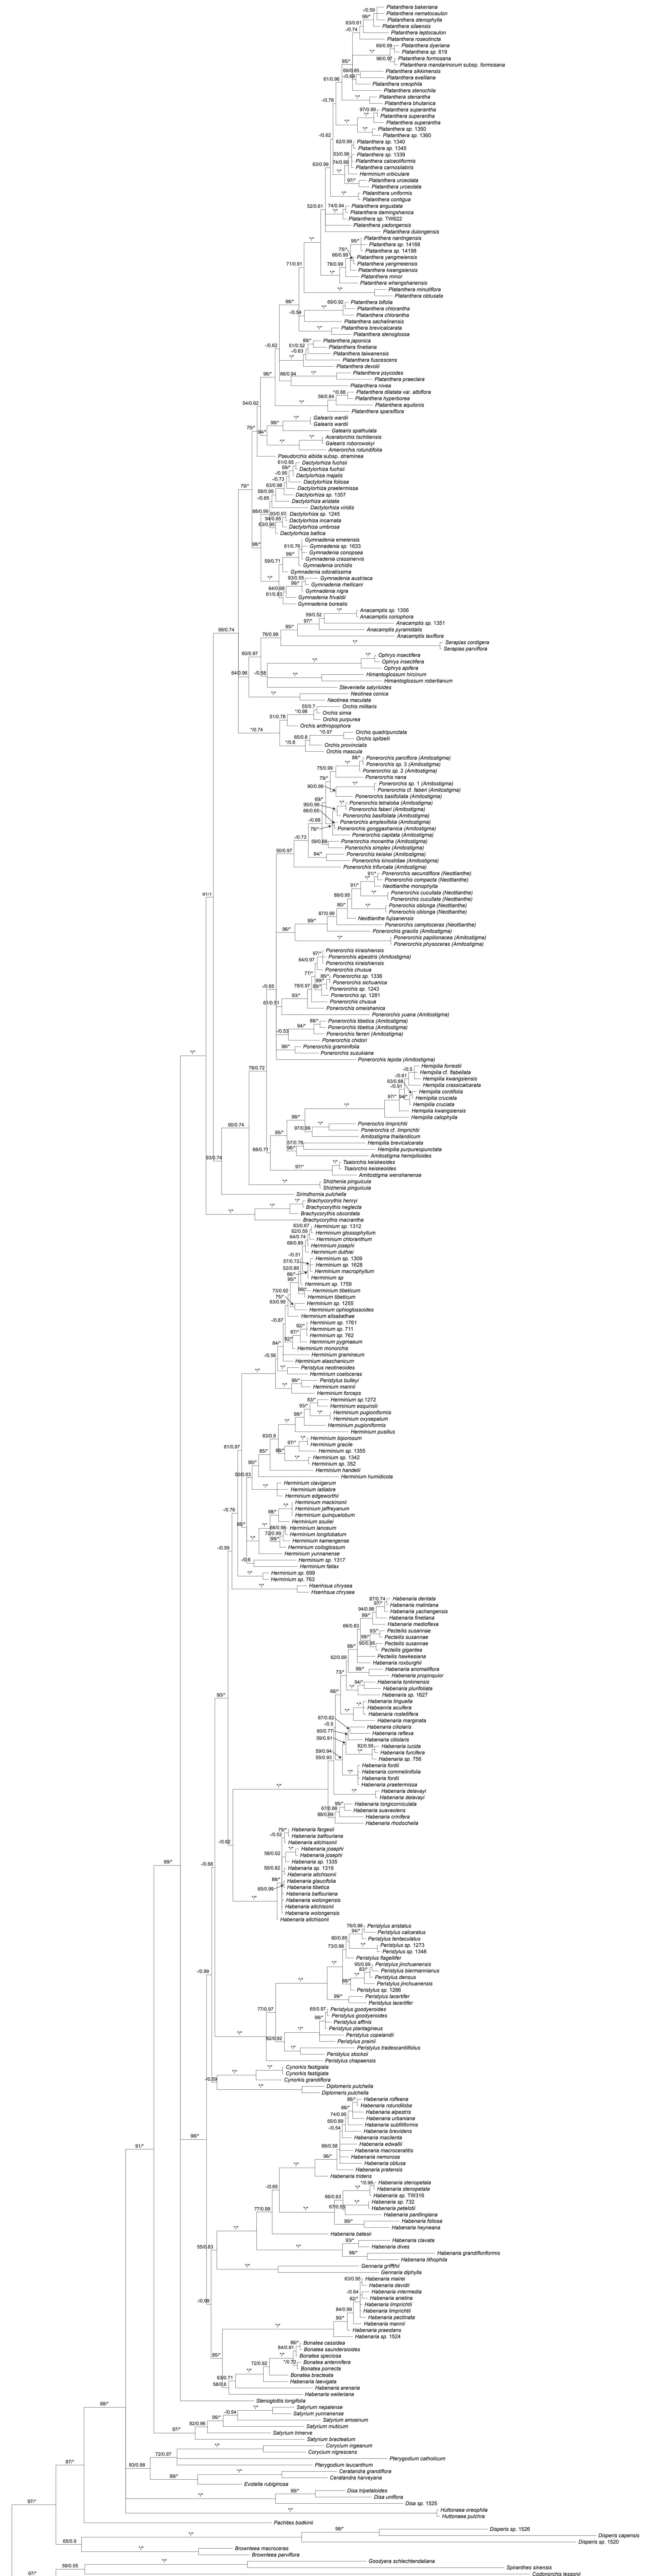

Supplement: 12870_2017_1160_MOESM4_ESM.pdf [file 12870_2017_1160_MOESM4_ESM.pdf]
